# Supplementary material for: Development of a Method for Detecting and Estimating Moniliophthora roreri Spore Loads Based on Spore Traps and qPCR
Source: MDPI journal article supplement (doi:10.3390/jof9010047), 2022-12-28
Supplement: s1 [file s1]

A

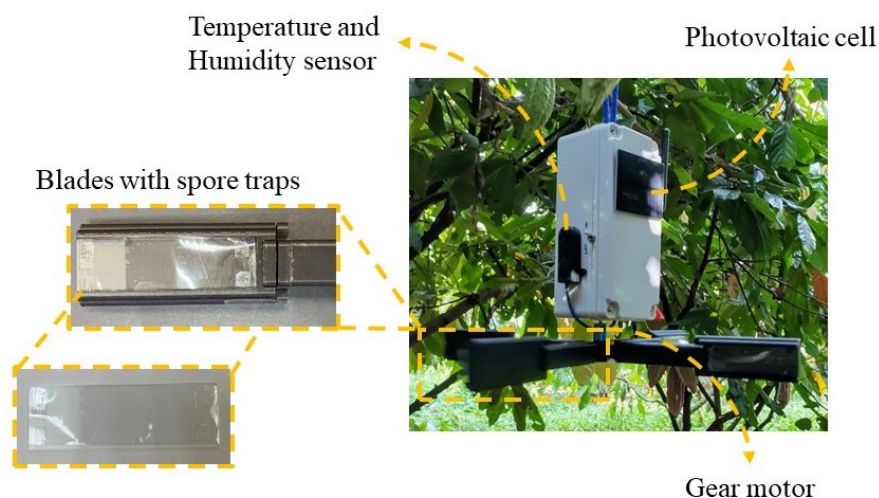

B

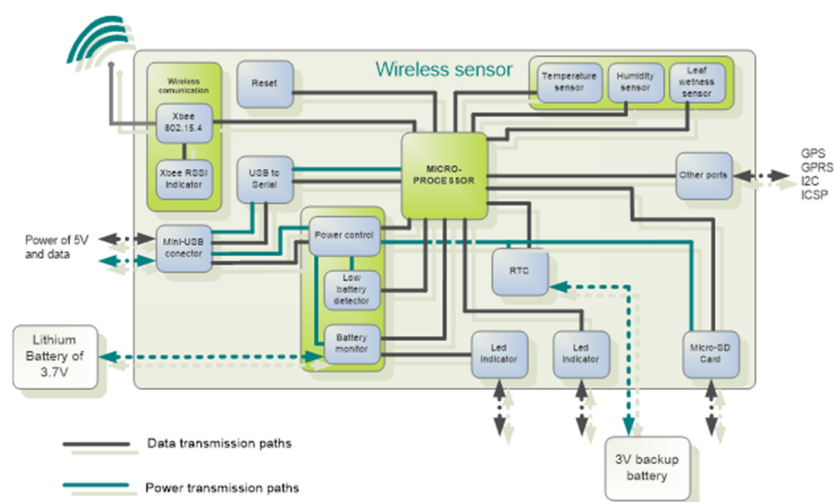

**Figure S1.** Spore-trap device developed for assessing the *Moniliophthora roreri* spore load in cacao plantations. A) shows a picture of the device with a spore trap by itself and in the blade (detail). B) is a block diagram showing the main components of the spore-trap device.

|                                    |                                                                                |     |
|------------------------------------|--------------------------------------------------------------------------------|-----|
| M. roreri MR2                      | ACCAAGAGGCGCAAGGTGCGTTCAAAGATTGATGATTCACTGAATTCTGCAATTCACATTACTTATCGCATTTC     | 414 |
| M. roreri MCA2954                  | ACCAAGAGGCGCAAGGTGCGTTCAAAGATTGATGATTCACTGAATTCTGCAATTCACATTACTTATCGCATTTC     | 402 |
| M. pernicioso COAD2616             | ACCAAGAGGCGCAAGGTGCGTTCAAAGATTGATGATTCACTGAATTCTGCAATTCACATTACTTATCGCATTTC     | 420 |
| M. pernicioso basidiocarp          | ACCAAGAGGCGCAAGGTGCGTTCAAAGATTGATGATTCACTGAATTCTGCAATTCACATTACTTATCGCATTTC     | 385 |
| Mr_ITSF: GGTCAATTAAG               |                                                                                |     |
| M. roreri MR2                      | GCTGCGTTCTTCATCGATGCGAGAGCCAAGAGATCCGTTGCTGAAAGTTGTATAGTTTTTAAAGGGTCAATTAAG    | 489 |
| M. roreri MCA2954                  | GCTGCGTTCTTCATCGATGCGAGAGCCAAGAGATCCGTTGCTGAAAGTTGTATAGTTTTTAAAGGGTCAATTAAG    | 477 |
| M. pernicioso COAD2616             | GCTGCGTTCTTCATCGATGCGAGAGCCAAGAGATCCGTTGCTGAAAGTTGTATAGTTT-TTAAAGGGTCAATTAAG   | 494 |
| M. pernicioso basidiocarp          | GCTGCGTTCTTCATCGATGCGAGAGCCAAGAGATCCGTTGCTGAAAGTTGTATAGTTT-TTAAAGGGTCAATTAAG   | 459 |
| Consensus                          | TCCCAATAAAATACACA                                                              |     |
| M. roreri MR2                      | TCCCAATAAAATACACATTCTAAACATACATTAAGTGTGTGTTA-A--A-ACATAGTGAGACTCCGTACTGAGA     | 559 |
| M. roreri MCA2954                  | TCCCAATAAAATACACATTCTAAACATACATTAAGTGTGTGTTA-A--A-ACATAGTGAGACTCCGTACTGAGA     | 547 |
| M. pernicioso COAD2616             | TCCCAATAAAATAC--ATTCTAAACATACATTAAGTGTGT-T.AAAAACAAACATAGT-AGACTCCGTACT.AGA    | 565 |
| M. pernicioso basidiocarp          | TCCCAATAAAATAC--ATTCTAAACATACATTAAGTGTGT-T.AAAAACAAACATAGT-AGACTCCGTACT.AGA    | 530 |
| Mr_ITSR: CC-GTTCAGAAATCCACTACAAAAG |                                                                                |     |
| M. roreri MR2                      | -AAACGCAAGCGCCTCCC-GTTCAGAAATCCACTACAAAAGTTTACAGGTGGATGAAGATTGAAAGTCGGCGAG     | 632 |
| M. roreri MCA2954                  | -AAACGCAAGCGCCTCCCCTCCGTTCCAGAAATCCACTACAAAAGTTTACAGGTGGATGAAGATTGAAAGTCGGCGAG | 621 |
| M. pernicioso COAD2616             | .AAACGCAAGCGCCTCCC..TTCCAGAATC..CTACAAAAGTTTACAGGTGGATGAA..TTGAAAGTCGGCGAG     | 640 |
| M. pernicioso basidiocarp          | .AAACGCAAGCGCCTCCC..TTCCAGAATC..CTACAAAAGTTTACAGGTGGATGAA..TTGAAAGTCGGCGAG     | 605 |
|                                    |                                                                                |     |
| M. roreri MR2                      | CACATGCCCTAAGAAGAGCCAGCTCAAAACCTC-----                                         | 707 |
| M. roreri MCA2954                  | CACATGCCCTAAGAAGAGCCAGCTCAAAACCTCCTTTACAATGTTTTCAATAATGATCCTTCCG-----          | 696 |
| M. pernicioso COAD2616             | CACATGCC-CTAC-AAGAGCCAGCTCAA--CCTCCTTTACAATGTTTTCAATAATGATCCTTCCGAGTTCCACC     | 711 |
| M. pernicioso basidiocarp          | CACATGCC-CTAC-AAGAGCCAGCTCA-----                                               | 678 |

**Figure S2.** Sequence alignment of the ITS sequences of the *Moniliophthora roreri* strains MR2 (OM056946) and MCA2954 (Genbank DQ222927) and *Moniliophthora pernicioso* strain COAD2616 (Genbank MK785158) and basidiocarp (Genbank OM056947) showing the binding sites of the Mr\_ITSF and Mr\_ITSR primers.

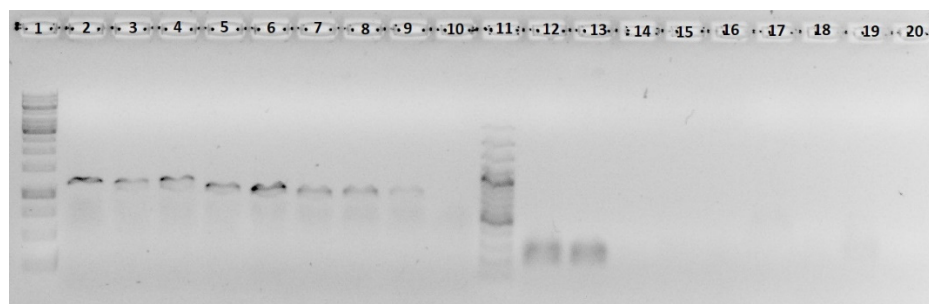

**Figure S3.** Agarose gel showing the PCR products for the ITS fragments of *Moniliophthora roreri* and other fungi amplified with the ITS1 and ITS4 (Lanes: 1-10) and the Mr\_ITSF and Mr\_ITSR primers (Lanes: 11-20). Lanes 1 and 11: 100 bp ladder. Lanes 2 and 12: *M. roreri* strain MR1. Lanes 3 and 13: *M. roreri* strain MR2. Lanes 4 and 14: *M. pernicioso* basidiocarp. Lanes 5 and 15: *Diaporthe* sp. EAFIT-F0056. Lanes 6 and 16: *Alternaria* sp. EAFIT-F0059. Lanes 7 and 17: *Colletotrichum* sp. EAFIT-F0066. Lanes 8 and 18: *Pleurotus* sp. Lanes 9 and 19: *Ganoderma* sp. Lanes 10 and 20: Non-template control.

A

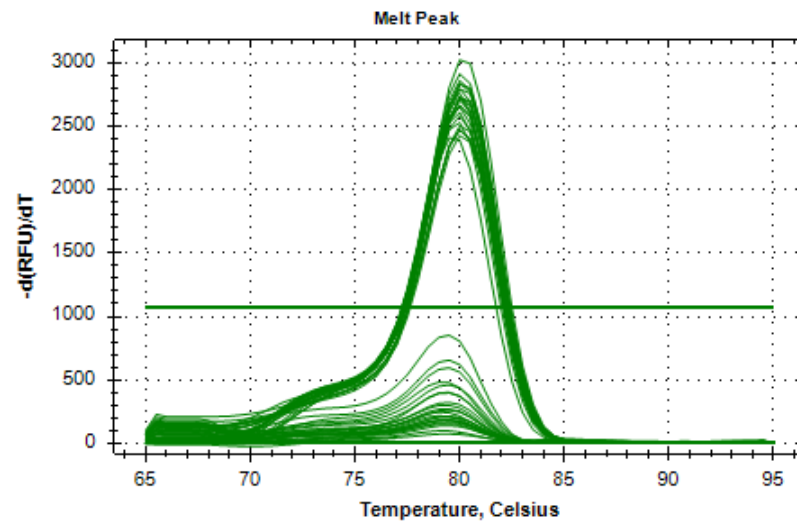

B

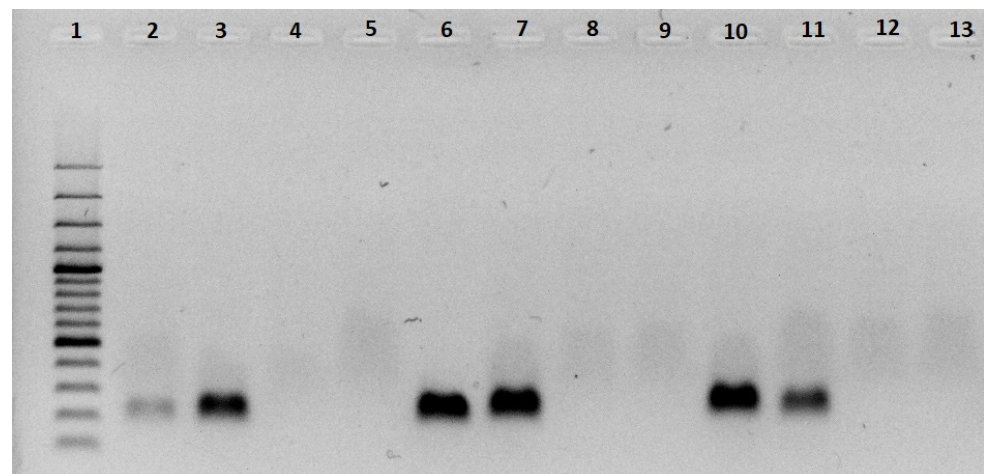

**Figure S4.** Representative images showing the dissociation curves (A) and agarose gel with the amplification products (B) of the qPCR targeting the ITS of *Moniliophthora roreri* with the Mr\_ITSF and Mr\_ITSR primers. The curves and gel belong to one of the experiments assessing different primers concentrations. In B, Lane 1: 100 bp ladder. Lane 2-5: 0.2 mM and 0.2 mM; Lane 6-9: 0.3 mM and 0.3 mM; and Lane 10-13: 0.4 mM and 0.3 mM (Mr\_ITSF and Mr\_ITSR primers concentration, respectively). Also, Lanes 2, 6, and 10: *M. roreri* strain MR1; Lanes 3, 7, and 11: *M. roreri* strain MR2; Lanes 4, 8, and 12: *M. perniciosa* basidiocarp; Lanes 5, 9, and 13: Non-template control.

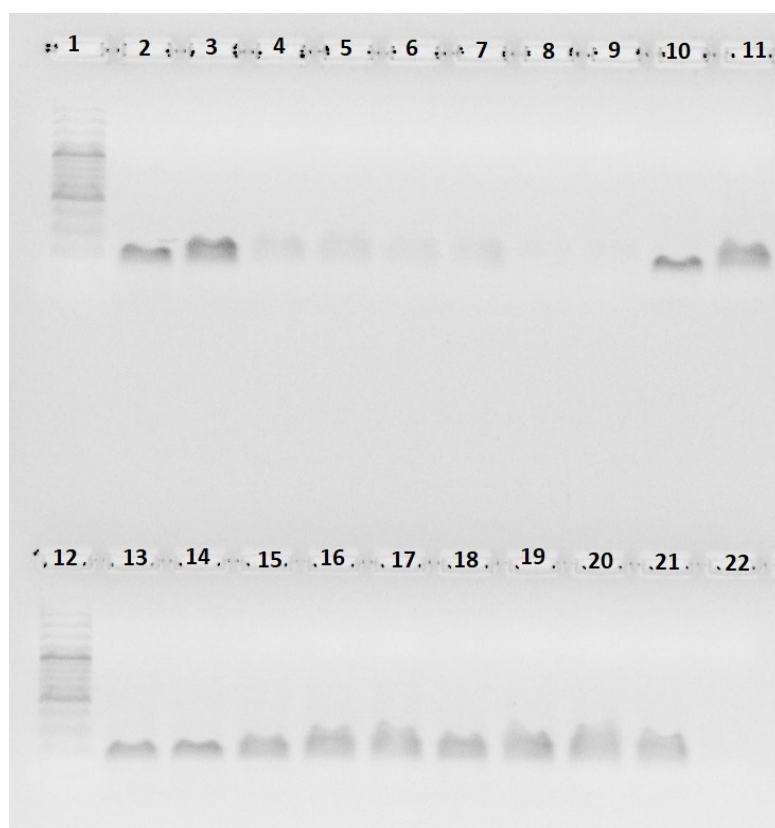

**Figure S5.** Agarose gel showing the qPCR products of the ITS fragments of *Moniliophthora roreri* and other fungi amplified with the Mr\_ITSF and Mr\_ITSR primers. Lanes 1 and 12: 100 bp ladder. Lanes 2: *M. roreri* strain MR1. Lane 3: *M. roreri* strain MR2. Lane 4: *M. perniciosus* basidiocarp. Lane 5: *Pleurotus* sp. Lane 6: *Ganoderma* sp. Lane 7: *Alternaria* sp. EAFIT-F0059. Lane 8: *Diaporthe* sp. EAFIT-F0056. Lane 9: *Colletotrichum* sp. EAFIT-F0066. Lane 10: *M. roreri* strain MR30. Lane 11: *M. roreri* strain MR33. Lane 13: *M. roreri* strain MR28. Lane 14: *M. roreri* strain MR48. Lane 15: *M. roreri* strain MR38. Lane 16: *M. roreri* strain MR98. Lane 17: *M. roreri* strain MR68. Lane 18: *M. roreri* strain MR108. Lane 19: *M. roreri* strain MR124. Lane 20: *M. roreri* strain MR126. Lane 21: *M. roreri* strain MR136. Lanes 22: Non-template control.

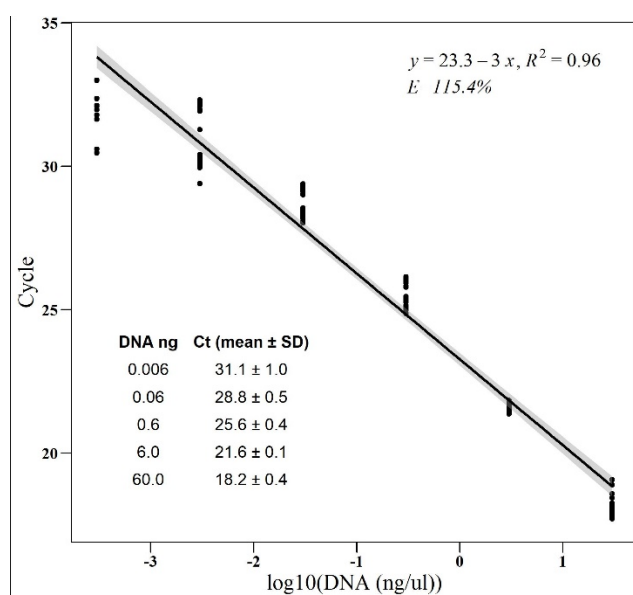

**Figure S6.** Correlation between the qPCR threshold cycle (Ct) and the logarithm with base 10 ( $\log_{10}$ ) of serial dilutions ( $\times 1/10^n$ ) of the DNA extracted from the mycelia of *M.*

*roreri* strain MR2 with concentrations between 30 and 0.0003 ng per µl were evaluated in two separated qPCR, each containing ten technical replicates per dilution. Non-template (H<sub>2</sub>O) and negative (*M. perniciosus* basidiocarp DNA) controls were included in every qPCR. A) shows the correlation between the qPCR threshold cycle (Ct) and the log<sub>10</sub> of the DNA concentration of the *M. roreri* serial dilutions. The points (n = 20 per log<sub>10</sub> of DNA concentration) represent each sample. The line and the gray area represent the prediction and standard error of the linear model (lm), respectively.

**Table S1.** Fungal strains used in this study.

| Strain                               | Molecular identity               |                    |                 | Isolation site                        |
|--------------------------------------|----------------------------------|--------------------|-----------------|---------------------------------------|
|                                      | Closest sequence <sup>a</sup>    | GB AN <sup>b</sup> | HI <sup>c</sup> |                                       |
| Isolated during the study            |                                  |                    |                 |                                       |
| MR1                                  | <i>Moniliophthora roreri</i>     | MH861051           | 100             | Barrancabermeja, Colombia             |
| MR2                                  | <i>Moniliophthora roreri</i>     | KU674835           | 100             | Barrancabermeja, Colombia             |
| MR124                                | <i>Moniliophthora roreri</i>     | OP807173           | 100             | Necoclí, Antioquia, Colombia          |
| MR126                                | <i>Moniliophthora roreri</i>     | OP820440           | 100             | Necoclí, Antioquia, Colombia          |
| MR68                                 | <i>Moniliophthora roreri</i>     | OP820441           | 100             | Palestina, Caldas, Colombia           |
| MR134                                | <i>Moniliophthora roreri</i>     | OP807112           | 100             | Orito, Putumayo, Colombia             |
| MR98                                 | <i>Moniliophthora roreri</i>     | OP820439           | 100             | Villanueva, Casanare, Colombia        |
| MR38                                 | <i>Moniliophthora roreri</i>     | OP784768           | 100             | Barrancabermeja, Santander, Colombia  |
| MR136                                | <i>Moniliophthora roreri</i>     | OP806971           | 100             | Orito, Putumayo, Colombia             |
| MR33                                 | <i>Moniliophthora roreri</i>     | OP784771           | 100             | San José del Nus, Antioquia, Colombia |
| MR108                                | <i>Moniliophthora roreri</i>     | OP820443           | 100             | Rivera, Huila, Colombia               |
| MR30                                 | <i>Moniliophthora roreri</i>     | OP781680           | 100             | San José del Nus, Antioquia, Colombia |
| MR28                                 | <i>Moniliophthora roreri</i>     | OP781654           | 100             | San José del Nus, Antioquia, Colombia |
| MR48                                 | <i>Moniliophthora roreri</i>     | OP820438           | 100             | Paz de Ariporo, Casanare, Colombia    |
| ND                                   | <i>Moniliophthora perniciosa</i> | MH861049           | 100             | Barrancabermeja, Colombia             |
| Culture collection Universidad EAFIT |                                  |                    |                 |                                       |
| ND                                   | <i>Pleurotus</i> sp.             | MK673812           | 100             | --                                    |
| ND                                   | <i>Ganoderma</i> sp.             | un-published       | ND              | --                                    |
| EAFIT-F0056                          | <i>Diaporthe phaseolorum</i>     | MN997107           | 99.8            | --                                    |
| EAFIT-F0059                          | <i>Alternaria argyroxiphii</i>   | NR136074           | 100             | --                                    |
| EAFIT-F0066                          | <i>Colletotrichum siamense</i>   | MZ066745           | 99.1            | --                                    |

<sup>a</sup> Fungal strain with the highest ITS sequence similarity according to BLAST.

<sup>b</sup> GeneBank accession number.

<sup>c</sup> Highest Identity, values between 0 and 100 %. ND, not defined.

**Table S2.** Primers and fungal ITS sequences used in this study.

| Primer                | Sequence                              | Target               | Reference  |
|-----------------------|---------------------------------------|----------------------|------------|
| ITS1                  | TCCGTAGGTGAACCTGCGG                   | Fungal ITS           | [1]        |
| ITS4                  | TCCTCCGCTTATTGATATGC                  | Fungal ITS           | [1]        |
| Mr-ITSF               | GGTCAATTAAGTCCCAATAAAATACACA          | <i>M. roreri</i> ITS | This study |
| Mr-ITSR               | CTTTTGTAGTGGATTCTGGAACGG              | <i>M. roreri</i> ITS | This study |
| <b>ITS GB</b>         |                                       |                      |            |
| AN <sup>b</sup>       | Fungal specie                         | Fungal strain        | Reference  |
| OM056945 <sup>d</sup> | <i>Moniliophthora roreri</i>          | MR1                  | This study |
| OM056946              | <i>Moniliophthora roreri</i>          | MR2                  | This study |
| JX515287              | <i>Moniliophthora roreri</i>          | B1b                  | Unpublish  |
| JX515288              | <i>Moniliophthora roreri</i>          | B2a                  | Unpublish  |
| JX315285              | <i>Moniliophthora roreri</i>          | E16                  | Unpublish  |
| JX315273              | <i>Moniliophthora roreri</i>          | SPCL                 | Unpublish  |
| MH861051              | <i>Moniliophthora roreri</i>          | CBS 202.77           | [2]        |
| KU674835              | <i>Moniliophthora roreri</i>          | CBS138635            | [3]        |
| JX315282              | <i>Moniliophthora roreri</i>          | Co12                 | Unpublish  |
| JX515290              | <i>Moniliophthora roreri</i>          | B3                   | Unpublish  |
| JX515291              | <i>Moniliophthora roreri</i>          | B4                   | Unpublish  |
| AY230254              | <i>Moniliophthora roreri</i>          | ND <sup>e</sup>      | [4]        |
| OM056947              | <i>Moniliophthora perniciosa</i>      | ND                   | This study |
| MK785162              | <i>Moniliophthora perniciosa</i>      | RWB1268              | Unpublish  |
| MK785163              | <i>Moniliophthora perniciosa</i>      | DIS70                | Unpublish  |
| MK785161              | <i>Moniliophthora perniciosa</i>      | RWB1267              | Unpublish  |
| MK785160              | <i>Moniliophthora perniciosa</i>      | RWB1205              | Unpublish  |
| MK785159              | <i>Moniliophthora perniciosa</i>      | RWB1065              | Unpublish  |
| MK785158              | <i>Moniliophthora perniciosa</i>      | COAD2616             | Unpublish  |
| MK785157              | <i>Moniliophthora perniciosa</i>      | COAD2615             | Unpublish  |
| MK785142              | <i>Moniliophthora perniciosa</i>      | COAS2600             | Unpublish  |
| MK785141              | <i>Moniliophthora perniciosa</i>      | COAS2599             | Unpublish  |
| MK785140              | <i>Moniliophthora perniciosa</i>      | COAD2598             | Unpublish  |
| MK785139              | <i>Moniliophthora perniciosa</i>      | COAD540              | Unpublish  |
| KY081771              | <i>Moniliophthora perniciosa</i>      | WMA14(B)             | [5]        |
| KY081770              | <i>Moniliophthora perniciosa</i>      | WMA5                 | [5]        |
| KY081769              | <i>Moniliophthora perniciosa</i>      | SCFT                 | [5]        |
| KY081768              | <i>Moniliophthora perniciosa</i>      | LJ8                  | [5]        |
| EU514248              | <i>Pseudocercospora fijiensis</i>     | CBS 120258           | [6]        |
| AY616686              | <i>Entonaema liquescens</i>           | agtS279              | [7]        |
| KF225610              | <i>Cytospora atrocirrhatta</i>        | HMBF156              | Unpublish  |
| JQ005152              | <i>Colletotrichum gloeosporioides</i> | CBS 112999           | [8]        |

|          |                                 |            |           |
|----------|---------------------------------|------------|-----------|
| JQ005776 | <i>Colletotrichum acutatum</i>  | CBS 112996 | [9]       |
| KJ909769 | <i>Bipolaris maydis</i>         | CBS136.29  | Unpublish |
| AM749934 | <i>Daldinia caldariorum</i>     | JPP 26211  | [10]      |
| FJ889444 | <i>Diaporthe alleghaniensis</i> | CBS 495.72 | [11]      |
| AF388914 | <i>Neurospora crassa</i>        | FGSC 987   | [12]      |
| KX986055 | <i>Nigrospora oryzae</i>        | LC6760     | [13]      |
| FJ889450 | <i>Phomopsis cotoneastri</i>    | CBS 439.82 | [11]      |

<sup>b</sup> GeneBank accession number.

<sup>c</sup> Highest Identity, values between 0 and 100 %. ND not defined.

<sup>d</sup> Bold sequences are the sequences submitted to the GeneBank during this study.

<sup>e</sup> ND, no defined.

**Table S3.** qPCR results for the evaluations assessing melting different temperatures and primers concentrations.

| Factor                                   | <i>M. roreri</i> strain     |                        | Controls <sup>a</sup> |          |
|------------------------------------------|-----------------------------|------------------------|-----------------------|----------|
|                                          | MR1                         | MR2                    | NTC                   | Negative |
| Temperature (°C)                         | Ct (mean ± SD) <sup>b</sup> |                        |                       |          |
| 55.5                                     | 23.8 ± 0.2 (b) <sup>c</sup> | 23.2 ± 0.1 (ab)        |                       |          |
| 56.5                                     | 24 ± 0.5 (b)                | 23.1 ± 1.2 (ab)        |                       |          |
| 59.4                                     | 24.2 ± 0.3 (b)              | 23.1 ± 0.8 (ab)        |                       |          |
| <b>61.6</b>                              | <b>22.3 ± 0.9 (a)</b>       | <b>21.8 ± 0.7 (a)</b>  | > 33                  | > 33     |
| 62.7                                     | 24.1 ± 0.0 (b)              | 23.8 ± 0.1 (ab)        |                       |          |
| 64                                       | 24 ± 0.0 (b)                | 24 ± 0.1 (b)           |                       |          |
| Primers' concentration (mM) <sup>d</sup> | Ct (mean ± SD)              |                        |                       |          |
| 0.2 - 0.2                                | 26.3 ± 0.1 (a)              | 25.6 ± 0.1 (bcd)       |                       |          |
| 0.2 - 0.3                                | 26.2 ± 0.3 (a)              | 25.5 ± 0.1 (abc)       |                       |          |
| 0.2 - 0.4                                | 26.4 ± 0.2 (ab)             | 25.3 ± 0.1 (a)         |                       |          |
| 0.3 - 0.2                                | 26.9 ± 0.1 (b)              | 25.8 ± 0.1 (cde)       |                       |          |
| <b>0.3 - 0.3</b>                         | <b>26 ± 0.2 (a)</b>         | <b>25.4 ± 0.1 (ab)</b> | > 33                  | > 33     |
| 0.3 - 0.4                                | 26.2 ± 0.1 (a)              | 25.5 ± 0.1 (abc)       |                       |          |
| 0.4 - 0.2                                | 26.3 ± 0.1 (a)              | 25.7 ± 0.1 (bcd)       |                       |          |
| 0.4 - 0.3                                | 26 ± 0.2 (a)                | 25.9 ± 0.3 (de)        |                       |          |
| 0.4 - 0.4                                | 26.2 ± 0.1 (a)              | 26.1 ± 0 (e)           |                       |          |

<sup>a</sup> NTC: non-template control (H<sub>2</sub>O); Negative: Negative control (*M. perniciosa* basidiocarp)

<sup>b</sup> Ct, qPCR threshold cycle; SD, standard deviation (n : 6)

<sup>c</sup> Statistical grouping according to the Tukey test, 95% confidence level (p-value < 0.05)

<sup>d</sup> Mr-ITSF and Mr-ITSR concentrations (Mr-ITSF - Mr-ITSR)

**Table S4.** Estimates for the general linearized model (glm) with the logit function and the binomial family error correlating the detection probability of the qPCR with the logarithm with base 10 (log10) of *Moniliophthora roreri* DNA in serial dilutions.

| model: glm (Probability ~ log10(DNA), family = binomial) |             |           |         |         |
|----------------------------------------------------------|-------------|-----------|---------|---------|
|                                                          | Estimates   | St. Error | Z value | p-value |
| Intercept                                                | 6.68        | 1.57      | 4.27    | <0.001  |
| log10(spores)                                            | 2.38        | 0.57      | 4.17    | <0.001  |
| Observations                                             |             |           |         | 6       |
| Null deviance                                            |             |           |         | 57.9    |
| Residual deviance                                        |             |           |         | 1.4     |
| AIC                                                      |             |           |         | 11.89   |
| Null model: glm (Probability ~ 1, family = binomial)     |             |           |         |         |
| Fixed effects                                            |             |           |         |         |
|                                                          | Odds Ratios | St. Error | Z value | p-value |
| Intercept                                                | 1.67        | 0.25      | 6.68    | <0.001  |
| Observations                                             |             |           |         | 6       |
| Null deviance                                            |             |           |         | 57.9    |
| Residual deviance                                        |             |           |         | 57.9    |
| AIC                                                      |             |           |         | 66.43   |
